# Supplementary material for: Targeted drug delivery via caveolae-associated protein PV1 improves lung fibrosis
Source: PubMed Central journal article supplement (PMC6405929; doi:10.1038/s42003-019-0337-2), 2019-03-07
Supplement: 42003_2019_337_MOESM1_ESM.pdf [file 42003_2019_337_MOESM1_ESM.pdf]

## Descriptions of Additional Supplementary File for Marchetti *et al.*

**File Name:** Supplementary Data 1

**Description:** The source data underlying the graphs and charts presented in main figures. The following source data are captured: relative mRNA expression, *ex vivo* imaging (tissue fluorescence relative to muscle or average radiant efficiency), antibody quantitation from serum, Ashcroft scores of H&E stained lung images, percent of lung with Second Harmonics Generated signal, Collagen positive lung area. These data underlie the graphs presented in Figures 1-6.
